# Supplementary material for: Ultra-fast co-sensitization and tri-sensitization of dye-sensitized solar cells with N719, SQ1 and triarylamine dyes
Source: Royal Society of Chemistry journal article supplement (doi:10.1039/c2jm31314f), 2012-01-01
Supplement: c2jm31314f.pdf [file c2jm31314f.pdf]

## Electronic Supplementary Information

### Ultra-fast Sensitization, Co-Sensitization and Tri-Sensitization of Dye-Sensitized Solar Cells with N719, SQ1 and Triarylamine Dyes

Peter J. Holliman<sup>a\*</sup>, Moneer Mohsen<sup>a</sup>, Arthur Connell<sup>a</sup>, Matthew L. Davies<sup>a</sup>, Kareem Al-Salihi<sup>a</sup>, Mateusz B. Pitak<sup>b</sup>, Graham J. Tizzard,<sup>b</sup> Simon J. Coles,<sup>b</sup> Ross W. Harrington,<sup>c</sup> William Clegg<sup>c</sup>, Carlos Serpa<sup>d</sup>, Octávio H. Fontes<sup>d</sup>, Cecile Charbonneau<sup>e</sup> and Matthew J. Carnie<sup>e</sup>

<sup>a</sup> School of Chemistry, Bangor University, Gwynedd, LL57 2UW, UK

<sup>b</sup> EPSRC National Crystallography Service, School of Chemistry, University of Southampton, Southampton SO17 1BJ, UK

<sup>c</sup> School of Chemistry, Newcastle University, Newcastle upon Tyne NE1 7RU, UK

<sup>d</sup> Chemistry Department, University of Coimbra, P3004-535 Coimbra, Portugal

<sup>e</sup> *SPECIFIC*, College of Engineering Swansea University, Baglan Bay Innovation and Knowledge Centre, Port Talbot SA12 7AZ (UK)

\*Corresponding author. Tel: 44 (0)1248 382375; Fax: 44 (0)1248 370528.

E-mail address: [p.j.holliman@bangor.ac.uk](mailto:p.j.holliman@bangor.ac.uk)

This paper describes the synthesis of a new yellow triphenylamine dye (**6**) and the literature red (**5**)<sup>ESI-1</sup> and the blue SQ1 dye<sup>ESI-1</sup>. The performance of (**5**) and (**6**) in dye-sensitized solar cell (DSC) devices has been measured using I-V and EQE. This ESI contains characterisation data for (**5**) and SQ1. Details of the DSC devices prepared to illustrate the success of the method are also included along with an energy level diagram showing HOMO and Frank-Condon levels for (**6**) and N719 (ESI Fig. 2), EQE data for selected dyes (ESI Fig. 3), raw photo-acoustic data for (**6**) and N719 (ESI Fig. 4), UV-visible calibration data (ESI Fig. 5) and device photographs (ESI Fig. 6).

## Experimental

### Preparation of diphenyl(4-vinyl)-amine (**2**)<sup>ESI-1</sup>

4-(*N,N*-Diphenylamino)-benzaldehyde (**1**) (7.5 g, 27.46 mmol) was dissolved in distilled THF (20 ml) under N<sub>2</sub> and added to a mixture of potassium *tert*-butoxide (4.62 g, 41.19 mmol) and methyl triphenyl phosphonium iodide (16.65 g, 41.19 mmol). This reaction mixture was stirred at RT for 24 h. The solution was then poured into distilled H<sub>2</sub>O/CH<sub>2</sub>Cl<sub>2</sub> (1:1, v/v) and the organic layer separated in a separating funnel, dried over anhydrous magnesium sulfate and the solvent removed *in vacuo*. The product was purified by column chromatography on silica gel in *n*-hexane/CH<sub>2</sub>Cl<sub>2</sub>

(95:5, v/v). The pure product was identified by TLC and precipitated in CH<sub>2</sub>Cl<sub>2</sub>/MeOH (1:20, v/v) to give a white solid. (Yield 5.40 g, 72.5%), mp 92-93 °C. Suitable but very small crystals for X-ray analysis were prepared by recrystallisation of **(2)** from CH<sub>2</sub>Cl<sub>2</sub>.

<sup>1</sup>H NMR (500 MHz, DMSO-d<sub>6</sub>) δ 5.15 (d, *J* = 11.0 Hz, 1H, H-CH=CH-), 5.69 (d, *J* = 17.6 Hz, 1H, H-CH=CH-), 6.66 (dd, *J* = 11.5, 10.7 Hz, 1H, CH<sub>2</sub>=CH-), 6.92 (d, *J* = 8.5 Hz, 2H, =CH-*Ph*-N-), 7.00 (d, *J* = 8.5 Hz, 4H, -N-*Ph*<sub>2</sub>), 7.04 (t, *J* = 7.55 Hz, 2H, -N-*Ph*<sub>2</sub>), 7.29 (t, *J* = 7.8 Hz, 4H, -N-*Ph*<sub>2</sub>), 7.37 (d, *J* = 8.2 Hz, 2H, =CH-*Ph*-N-). <sup>13</sup>C NMR (500 MHz, DMSO-d<sub>6</sub>) δ 112.60, 122.99, 123.16, 124.00, 127.24, 129.53, 131.47, 135.99, 146.91, 146.96. UV/vis (EtOH): λ<sub>max</sub> 308 nm. KBr ν/cm<sup>-1</sup>: ca. 3020, 2400, 1590, 1486, 1328. FTMS<sup>+</sup>-MS: (Accurate Mass), reference compound: NH<sub>4</sub>OAc, calcd. for C<sub>20</sub>H<sub>17</sub>N 272.1437; found 272.1468 [M+H]<sup>+</sup>.

### Preparation of 4-[2-(4-diphenylaminophenyl)vinyl]benzaldehyde (**3**)<sup>ESI-1</sup>

Compound **(2)** (3 g, 11.06 mmol) was added to a mixture of 4-bromobenzaldehyde (0.93g, 5.02 mmol), sodium carbonate (1.33 g, 12.56 mmol), 2,6-di-*tert*-butylcresol (0.22 g, 1.00 mmol) and *trans*-di(μ-acetato)bis[*O*-(di-*o*-tolylphosphino)benzyl]dipalladium(II) (47.1 mg, 0.05 mmol) in anhydrous *N,N*-dimethylacetamide (DMAC) (20 ml) and the solution was stirred at 130 °C for 24 h. After cooling, the solution was poured into distilled H<sub>2</sub>O/CH<sub>2</sub>Cl<sub>2</sub> (1:1 v/v) and the mixture separated in a separating funnel. The organic layer was then dried over anhydrous magnesium sulfate, the solvent removed *in vacuo* and the product purified by column chromatography on silica gel with petroleum spirit/CH<sub>2</sub>Cl<sub>2</sub> (95:5, v/v). The product was identified by TLC and the solvent removed *in vacuo* followed by precipitation in MeOH to give a yellow solid. Yield 2.0 g, 48%, mp 144-146°C. Suitable crystals for X-ray analysis were prepared by recrystallisation of **(3)** from CH<sub>2</sub>Cl<sub>2</sub>.

<sup>1</sup>H NMR (500 MHz, DMSO-d<sub>6</sub>) δ 6.95 (d, *J* = 8.5 Hz, 2H, -*Ph*-N-*Ph*<sub>2</sub>), 7.05 (d, *J* = 8.2 Hz, 4H, -N-*Ph*<sub>2</sub>), 7.08 (t, *J* = 8.2 Hz, 2H, -N-*Ph*<sub>2</sub>), 7.19 (d, *J* = 16.4 Hz, 1H, -CH=CH-*Ph*-), 7.32 (t, *J* = 7.8 Hz, 4H, -N-*Ph*<sub>2</sub>), 7.41 (d, *J* = 16.4 Hz, 1H, -CH=CH-*Ph*-), 7.55 (d, *J* = 8.5 Hz, 2H, -*Ph*-N-*Ph*<sub>2</sub>), 7.77 (d, *J* = 8.2 Hz, CHO-*Ph*-CH=), 7.88 (d, *J* = 8.2 Hz, 2H, CHO-*Ph*-CH=), 9.97 (s, 1H, CHO-*Ph*-). <sup>13</sup>C NMR (500 MHz, DMSO-d<sub>6</sub>) δ 122.36, 123.54, 124.44, 125.40, 126.66, 128.13, 129.62, 130.00, 130.40, 131.51, 134.69, 143.47, 146.75, 147.44, 192.25. UV/vis (EtOH): λ<sub>max</sub> 300 nm, 400 nm. FT-IR (KBr) ν/cm<sup>-1</sup> 2924, 2853, 1695, 1586, 1166. FTMS<sup>+</sup>-MS: m/z (Accurate Mass), reference compound: NH<sub>4</sub>OAc, calcd. for C<sub>27</sub>H<sub>21</sub>NO 376.1696; found 376.1699 [M+H]<sup>+</sup>.

### Preparation of 2-cyano-3-{4-[2-(4-diphenylaminophenyl)vinyl]phenyl}acrylic acid (**5**)<sup>ESI-1</sup>

Compound **(3)** (0.5 g, 1.33 mmol) was dissolved in acetonitrile (20 ml) and cyanoacetic acid (2.27g, 26.63 mmol). Piperidine (1 ml) was added and the mixture was stirred at 90°C for 24 h under N<sub>2</sub>.

After cooling, the solution was poured into a mixture of CH<sub>2</sub>Cl<sub>2</sub>/H<sub>2</sub>O (pH was adjusted to 2 by addition of phosphoric acid). The mixture was separated using a separating funnel, and the organic layer removed *in vacuo* and subsequently dried over anhydrous sodium sulfate. The crude product was purified by column chromatography over silica gel using CHCl<sub>3</sub>/MeOH (9.7:0.3, v/v) as eluent, followed by precipitation in methanol to give (**5**) as a red solid. Yield 0.35g, 60.3 %, mp 210-212°C.

<sup>1</sup>H NMR (500 MHz, DMSO-d<sub>6</sub>) δ 6.96 (d, *J* = 8.5 Hz, 2H, -*Ph*-N-*Ph*<sub>2</sub>), 7.06 (m, 6H), 7.22 (d, *J* = 16.4 Hz, 1H, -CH=CH-*Ph*-), 7.31 (t, *J* = 7.6 Hz, 4H, -N-*Ph*<sub>2</sub>), 7.39 (d, *J* = 8.15 Hz, 1H, -CH=CH-*Ph*-), 7.51 (d, *J* = 8.5 Hz, 2H, -*Ph*-N-*Ph*<sub>2</sub>), 7.76 (d, *J* = 8.5 Hz, 2H, =CH-*Ph*-CH=), 8.04 (d, *J* = 8.55 Hz, 2H, =CH-*Ph*-CH=), 8.28 (s, 1H, -C=CH-*Ph*). <sup>13</sup>C NMR (500 MHz, DMSO-d<sub>6</sub>) δ 118.54, 122.98, 123.25, 124.14, 124.47, 126.25, 126.50, 126.77, 127.62, 127.73, 129.55, 129.62, 131.26, 136.96, 138.48, 146.95, 165.00. UV/vis (EtOH): λ<sub>max</sub>. 298 nm (ε = 25,000 M<sup>-1</sup>cm<sup>-1</sup>) and 370 nm (ε = 35,000 M<sup>-1</sup>cm<sup>-1</sup>), ε values are precise to ±0.5×10<sup>3</sup> M<sup>-1</sup> cm<sup>-1</sup>. FT-IR (KBr) ν/cm<sup>-1</sup> 3450, 3028, 2251, 1732, 1587, 1490, 1281, 1174. FTMS<sup>+</sup>-MS: *m/z* (Accurate Mass), reference compound: NH<sub>4</sub>OAc, calcd for C<sub>30</sub>H<sub>22</sub>N<sub>2</sub>O<sub>2</sub> 443.1754; found 443.1751 [M+H]<sup>+</sup>.

**Preparation of SQ1; 5-Carboxy-2-[[3-[(1,3-dihydro-3,3-dimethyl-1-ethyl-2H-indol-2-ylidene)methyl]-2-hydroxy-4-oxo-2-cyclobuten-1-ylidene]methyl]-3,3-trimethyl-1-octyl-3H-indolium<sup>ESI-2</sup>**

3-[(1-ethyl-1,3-dihydro-3,3-dimethyl-2H-indol-2-ylidene)methyl]-4-hydroxy-cyclobutene-1,2-dione (4 g, 13 mmol) and 5-Carboxy-2, 3, 3-trimethyl-1-octyl-3H-indolium iodide (4.9 g, 15 mmol) were dissolved in a mixture of benzene (50 ml) and *n*-butanol (50 ml). The mixture was refluxed with a Dean-Stark apparatus for 18 h. The solvent was partly removed until the product precipitated. The crude product was filtered off and purified by column chromatography (methylene chloride:methanol = 97:3). 5.9 g (80 %); m.p. = 288 °C.

<sup>1</sup>H NMR (500 MHz, Methanol-d<sub>4</sub>) 0.88 (t, *J* = 13 Hz, 3H, H37), 1.32-1.19 (overlapping peaks, 8H, H-33+34+34+36), 1.43 (t, *J* = 15 Hz, 3H, H-15), 1.47 (m, 3H, H-32), 1.82-1.78 (overlapping peaks, 14H, H-12+13+27+28+31), 4.12 (m, 2H, H-30), 4.26 (q, *J* = 21 Hz, 2H, H-14), 5.99 (s, 1H, H-18); 6.08 (s, 1H, H-3), 7.23 (m, 1H, H-25), 7.28 (m, 1H, H-8), 7.33 (m, 1H, H-10), 7.42 (m, 1H, H-9), 7.51 (m, 1H, H-7), 8.04 (m, 1H, H-22), 8.05 (m, 1H, H-24). MS (FTMS +) [M + H]<sup>+</sup> calculated = 581, [M + H]<sup>+</sup> observed = 581, *m/e* Accurate Mass (FTMS +), reference compound: NH<sub>4</sub>OAc, [M + H]<sup>+</sup> calculated = 581.3374, M<sup>+</sup> observed = 581.3362. Anal. Calcd for C<sub>37</sub>H<sub>44</sub>N<sub>2</sub>O<sub>4</sub>: C, 76.34; H, 7.64; N, 4.80; O, 11.02. Found: C, 76.17; H, 7.85; N, 4.63; O, 11.11.

UV-Visible  $\lambda_{\text{max}}$  645 nm ( $295000 \text{ M}^{-1}\text{cm}^{-1}$ ) in ethanol.

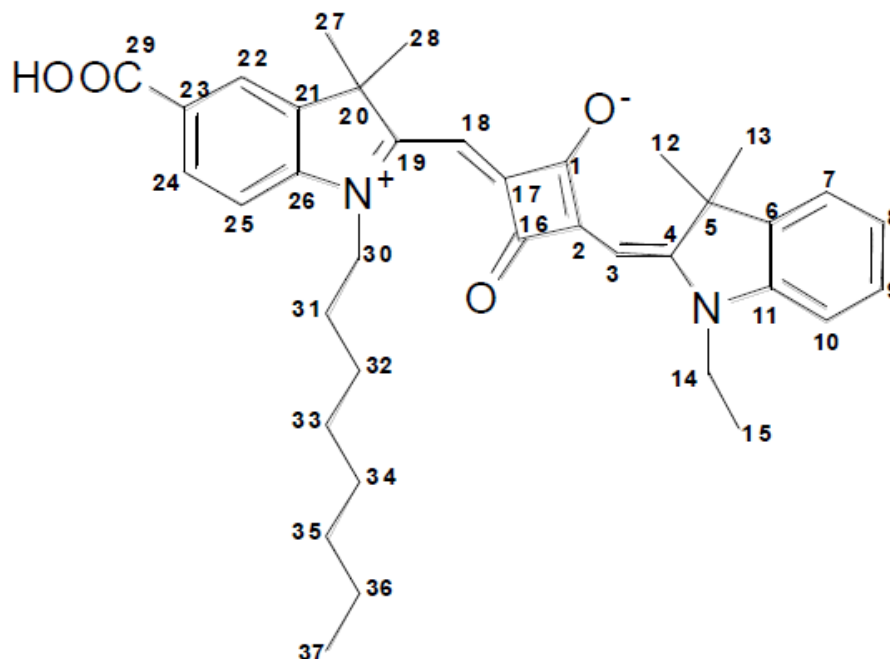

**ESI Figure 1.** Carbon labelling of SQ1 used for NMR assignments based on [ESI-2]

### Device Examples

**Device A** - A titania photo-electrode was submersed in an ethanol solution containing **(6)** (0.1 mM) for a period of 18 hours. The electrode was then removed from the dye solution and the cell was constructed as described for passive dyeing.

**Device B** - A titania photo-electrode was submerged in an ethanol solution containing **(5)** (0.1 mM) for a period of 18 hours. The electrode was then removed from the dye solution and the cell was constructed as described for passive dyeing.

**Device C** - A titania photo-electrode was submersed in an acetonitrile:*tert*-butanol (1:1 v/v) solution containing N719 (0.5 mM) for a period of 18 hours. The electrode was then removed from the dye solution and the cell was constructed as described for passive dyeing.

**Device D** - 1.5 ml of **(6)** (2 mM) in ethanol was pumped through the DSC cell cavity over a period of 5 minutes at a temperature of 50 °C followed by electrolyte at ambient temperature.

**Device E** - 1.5 ml of **(5)** (2 mM) in ethanol was pumped through the DSC cell cavity over a period of 5 minutes at a temperature of 50 °C followed by electrolyte at ambient temperature.

**Device F** - 1.5 ml of a mixture of SQ1 (0.05 mM) and CDCA (5 mM) in ethanol was pumped through the DSC cell cavity over a period of 5 minutes at a temperature of 50 °C followed by electrolyte at ambient temperature.

**Device G** - 1.5 ml of N719 dye in a 1:1 mixture of acetonitrile/*tert*-butyl alcohol (8.6 mM) was pumped through the DSC cell over a period of 5 minutes at a temperature of 50 °C followed by electrolyte at ambient temperature.

**Device H** - 1.5 ml of **(6)** (2 mM) in ethanol was pumped through the DSC cell cavity over a period of 5 minutes at a temperature of 50 °C followed by the addition of 1.5 ml of N719 dye in a 1:1 mixture of acetonitrile/*tert*-butyl alcohol (8.6 mM), also pumped for 5 minutes at a temperature of 50 °C. The electrolyte was added straight after the dye solutions at ambient temperature.

**Device I** - 1.5 ml of **(5)** (2 mM) in ethanol was pumped through the DSC cell cavity over a period of 5 minutes at a temperature of 50 °C followed by the addition of 1.5 ml of N719 dye in a 1:1 mixture of acetonitrile/*tert*-butyl alcohol (8.6 mM), also pumped for 5 minutes at a temperature of 50 °C. The electrolyte was added straight after the dye solutions at ambient temperature.

**Device J** - 1.5 ml of **(6)** (2 mM) in ethanol was pumped through the DSC cell cavity over a period of 5 minutes at a temperature of 50 °C followed by 1.5 ml of **(5)** (2 mM) in ethanol also pumped for 5 minutes at a temperature of 50 °C. The electrolyte was added straight after the dye solutions at ambient temperature.

**Device K** - 1.5 ml of **(6)** (2 mM) in ethanol was pumped through the DSC cell cavity over a period of 5 minutes at a temperature of 50 °C followed by 1.5 ml of SQ1 (0.05 mM) and CDCA (5 mM) in ethanol also pumped for 5 minutes at a temperature of 50 °C. The electrolyte was added straight after the dye solutions at ambient temperature.

**Device L** - 1.5 ml of **(6)** (2 mM) in ethanol was pumped through the DSC cell cavity followed by 1.5 ml of N719 dye in a 1:1 mixture of acetonitrile/*tert*-butyl alcohol (8.6 mM) followed by 1.5 ml of SQ1 (0.05 mM) and CDCA (5 mM) in ethanol. Each dye solution was pumped for 5 minutes at a temperature of 50 °C. The electrolyte was added straight after the dye solutions at ambient temperature.

**Device M** - 1.5 ml of **(6)** (2 mM) in ethanol was pumped through the DSC cell cavity followed by 1.5 ml of **(5)** (2 mM) followed by 1.5 ml of SQ1 (0.05 mM) and CDCA (5 mM) in ethanol. Each dye solution was pumped for 5 minutes at a temperature of 50 °C. The electrolyte was added straight after the dye solutions at ambient temperature.

### Calibration of UV-visible spectrometer to measure dye loadings

A calibration graph for **(6)** was created by dissolving **(6)** in ethanol and measuring the absorbance of the solution in quartz cuvettes (1 cm path-length) at  $\lambda = 384$  nm on a Perkin Elmer 35 UV-visible spectrometer giving  $\epsilon = 32,349 \text{ L cm}^{-1} \text{ mol}^{-1}$  (ESI Fig. 5a). A similar graph was created for N719 by measuring Absorbance at  $\lambda_{\text{max}} = 520$  nm (ESI Fig. 5b) giving  $\epsilon = 13,312 \text{ L cm}^{-1} \text{ mol}^{-1}$ . However, a second graph for N719 was created using data at 384 nm (i.e. the  $\lambda_{\text{max}}$  of **(6)**) coincidentally giving the same  $\epsilon$  value as for the data at 520 nm. This procedure was carried out because both N719 and **(6)** absorb at 384 nm; hence, for mixed solutions of **(6)** and N719 desorbed from co-sensitized devices, any absorbance from N719 could be subtracted from the data by first recording the N719 concentration at 520 nm, then calculating the value at 384 nm and subtracting this from the experimental value to give a more accurate concentration of **(6)**.

### Acknowledgements

We gratefully acknowledge EPSRC grant (EP/E03585X/1) support for AC, ERDF-WAG Low Carbon Research Institute funding for the SPARC consortium for MLD and AC, Iraqi Government support for MM, and Swansea University EPSRC National Mass Spectrometry Service. We thank EPSRC for funding the National Crystallography Service (Southampton and Newcastle), and Diamond Light Source for access to synchrotron facilities. We thank Prof Worsley and his group at Swansea University for help with IV measurements and Tata Steel Colors Ltd and Dyesol Ltd for help with spectral response measurements and Dr Piers Barnes (ICL) for assistance with EIS transmission line modelling. CS and OHF acknowledge the support for project PTDC/QUI/QUI/099730/2008 from Fundação para a Ciência e a Tecnologia (Portugal) through the COMPETE programme and from FEDER (European Union).

### References

- [ESI-1] S. Hwang, J-H. Lee, Cha. Park, H. Lee, Cha. Kim, Chi. Park, M-H. Lee, W. Lee, J. Lee, K. Kim, Chu. Kim, *Chem. Commun.*, **2007**, 4887.
- [ESI-2] A. Burke, L. Schmidt-Mende, S. Ito and M. Grätzel, *Chem. Commun.*, 2007, 234.

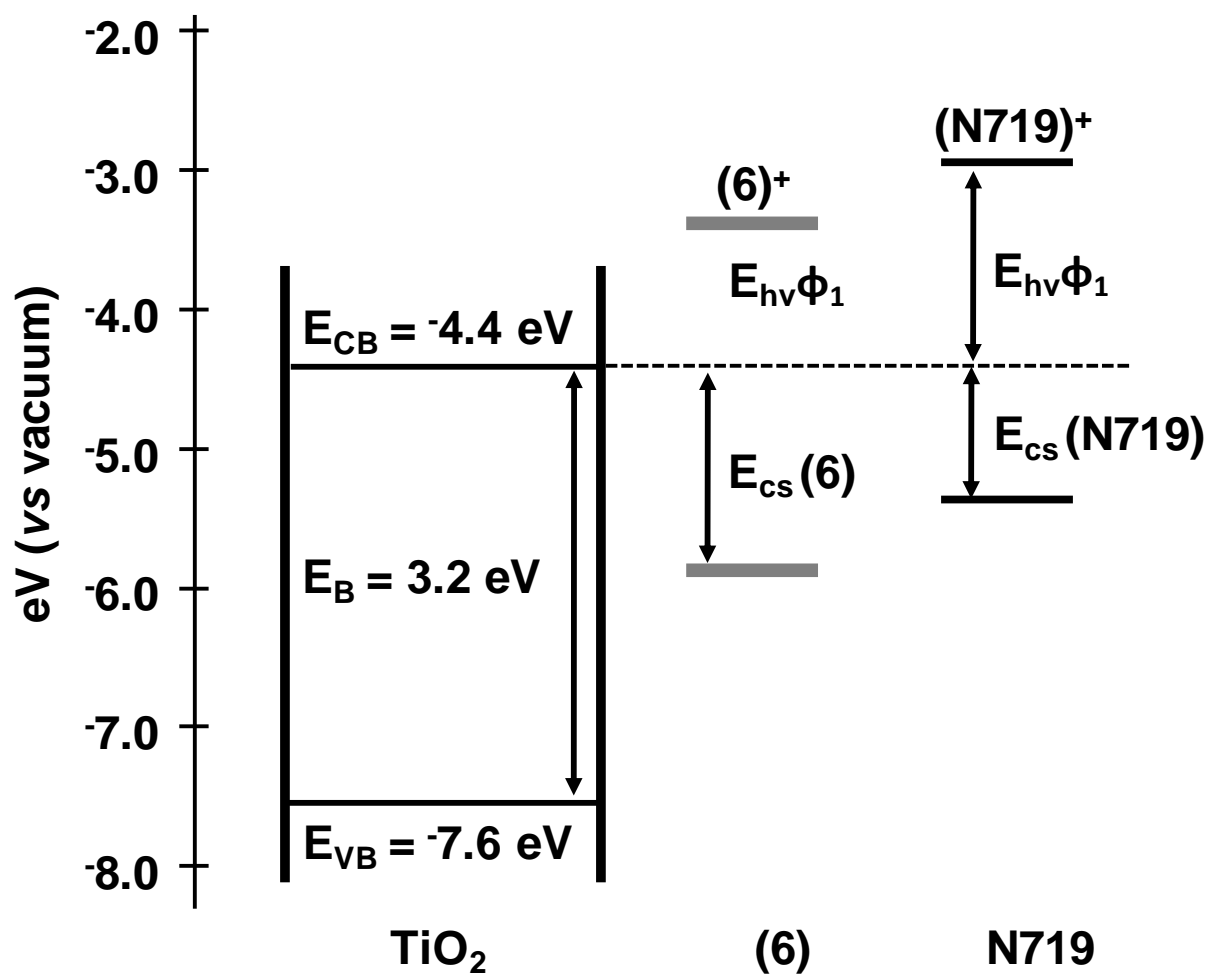

**ESI Figure 2.** Charge separation energies ( $E_{\text{cs}}$ ), HOMO and Frank-Condon levels for **(6)** and N719

where  $E_{\text{hv}}$  is the laser energy ( $\lambda = 495 \text{ nm}$ ) and  $\phi_1$  is the fraction of heat released

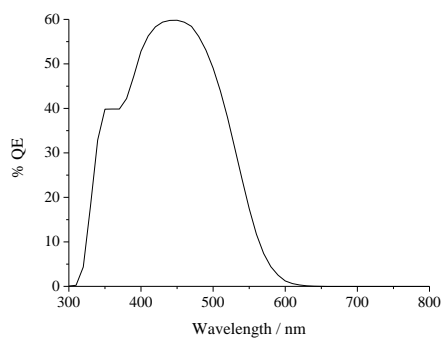

**ESI Fig. 3a** EQE of **(5)**

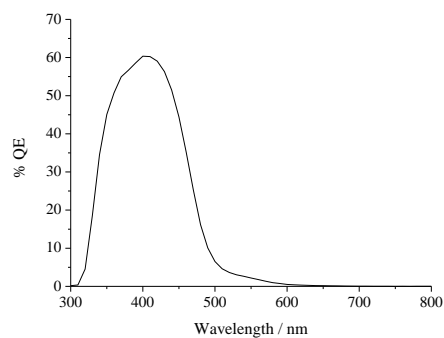

**ESI Fig. 3b** EQE of **(6)**

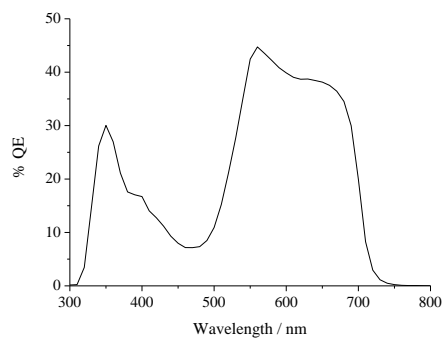

**ESI Fig. 3c** ESE of SQ1

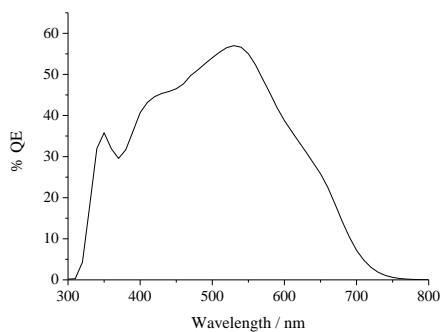

**ESI Fig. 3d** EQE of N719

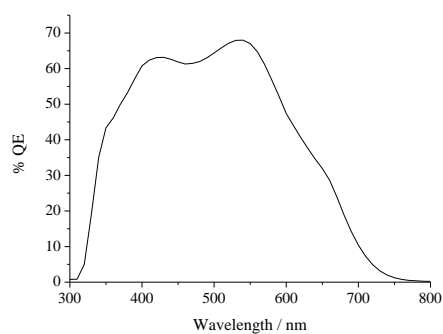

**ESI Fig. 3e** EQE for (6) + N719

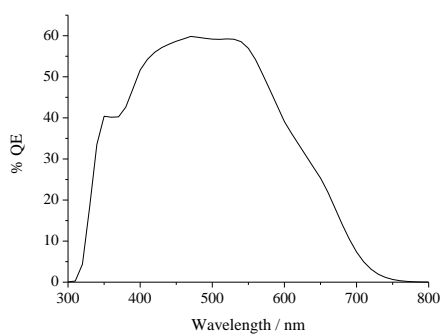

**ESI Fig. 3f** EQE for (5) + N719

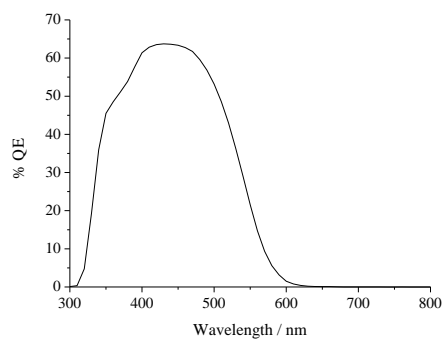

**ESI Fig. 3g** EQE for (5) + (6)

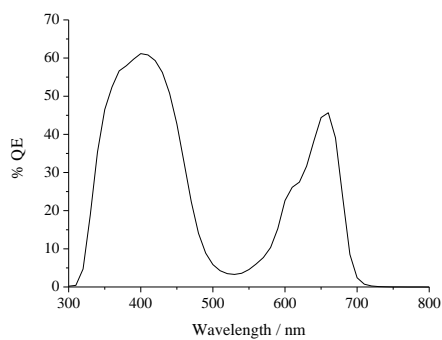

**ESI Fig. 3h** EQE for (6) + SQ1

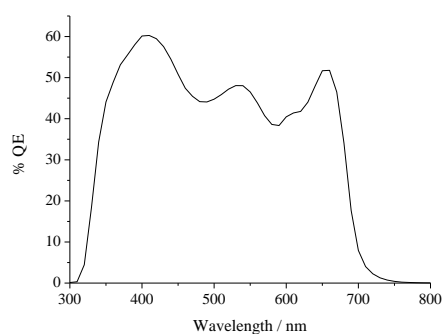

**ESI Fig. 3i** EQE for (6) + SQ1 + N719

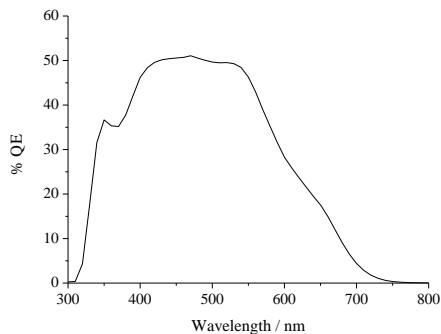

**ESI Fig. 3j** EQE for (6) + (5) + N719

### ESI Figure 3. Spectral response of DSC devices



## Raw Data from Photoacoustic Calorimetry (PAC) Measurements

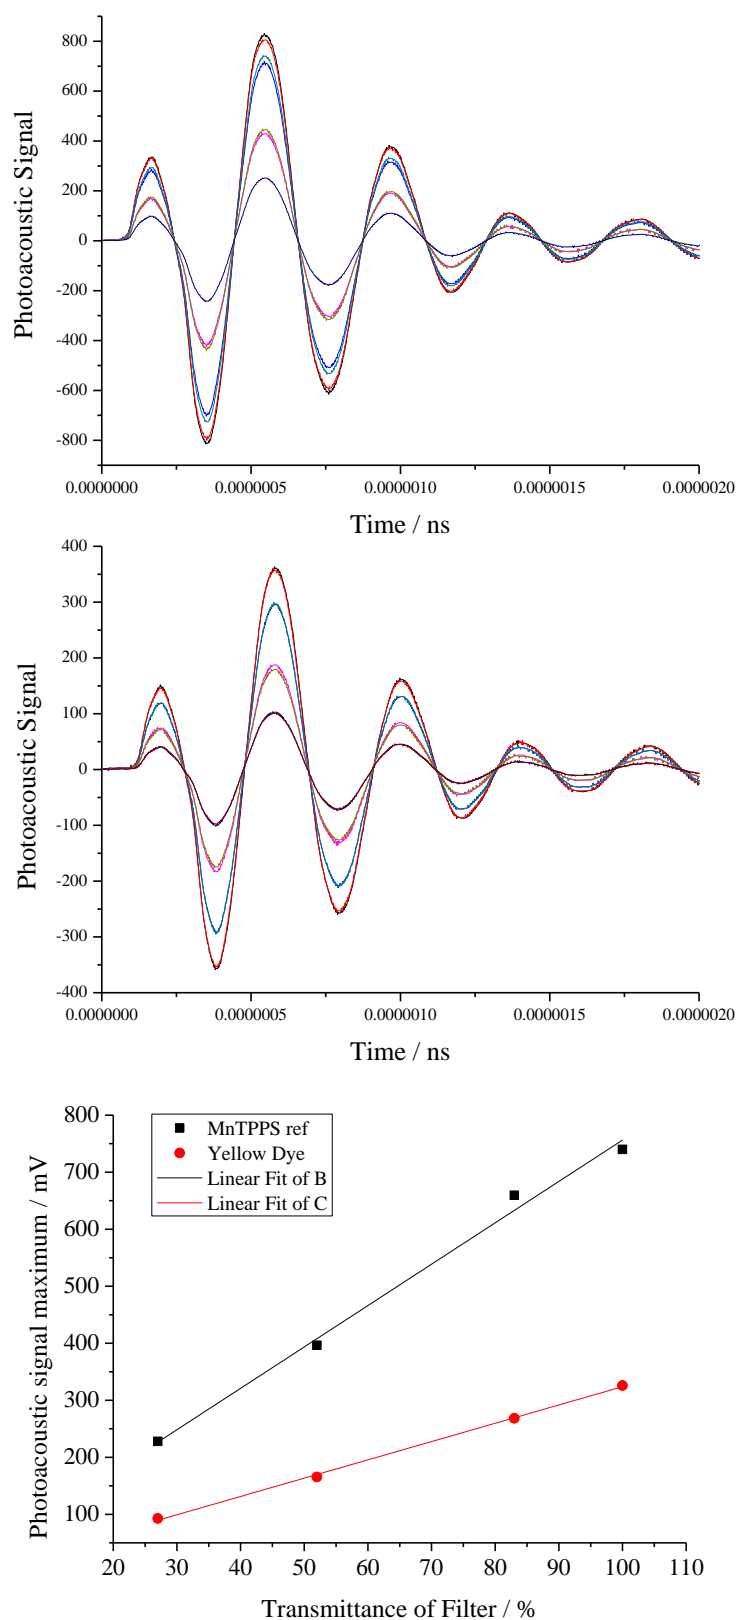

**ESI Figure 4.** Photoacoustic signals of glass-supported  $\text{TiO}_2$  films dyed with (top) reference dye MnTPPS and (middle) (6) at different laser intensities, and (c) PAC signals plotted *versus* laser intensity as denoted by %T of filter.

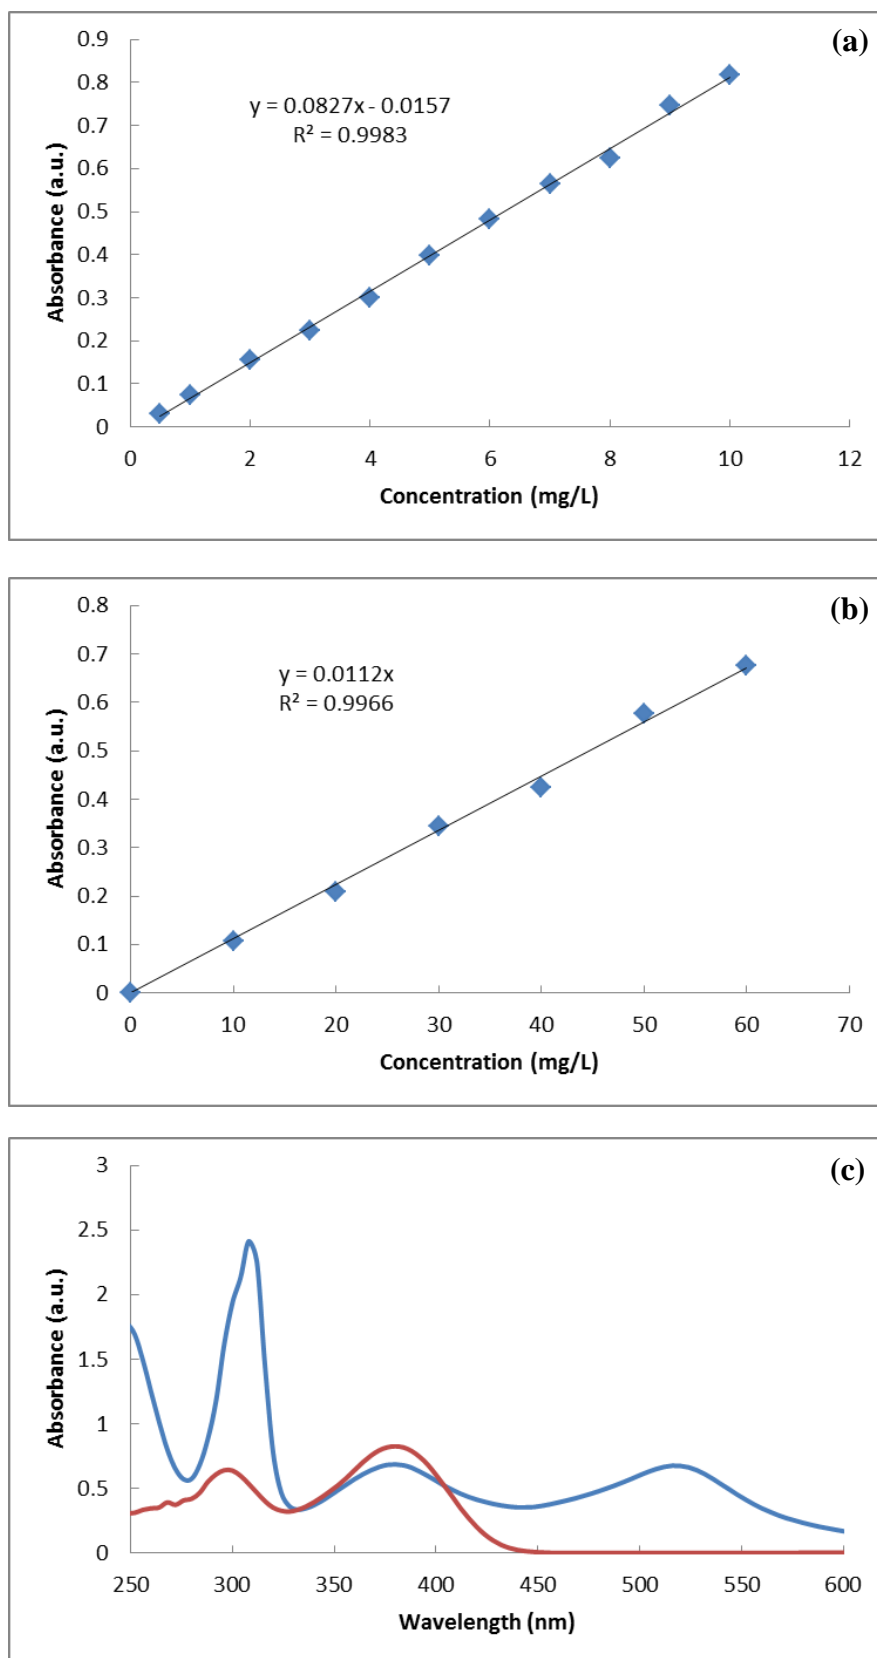

**ESI Figure 5:** Calibration graphs of (a) Absorbance at 384 nm *versus* concentration for **(6)** in ethanol giving a molar extinction coefficient for **(6)** of  $32,349 \text{ L cm}^{-1} \text{ mol}^{-1}$  and (b) Absorbance at 520 nm *versus* concentration for N719 in ethanol giving a molar extinction coefficient for N719 of  $13,312 \text{ L cm}^{-1} \text{ mol}^{-1}$  (an identical graph was plotted for N719 using data at  $\lambda = 384 \text{ nm}$ ) and (c) UV-visible spectra of 10 mg/L of **(6)** - red line and 60 mg/L N719 - blue line.

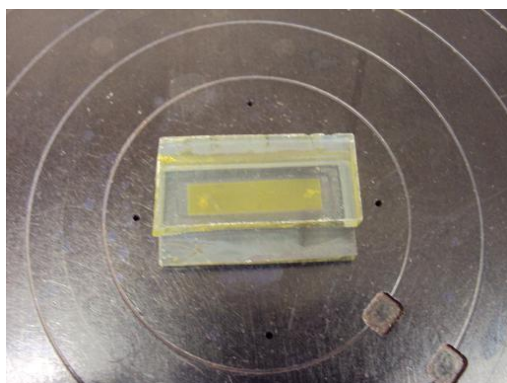

**Device D dyed with (6)**

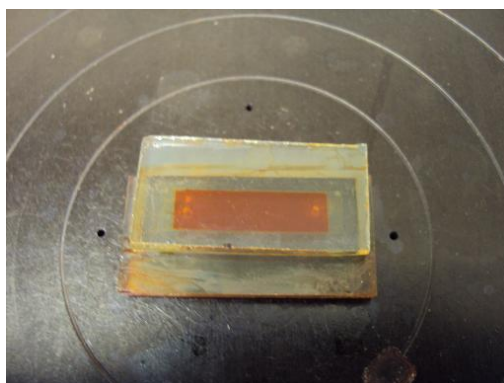

**Device E dyed with (5)**

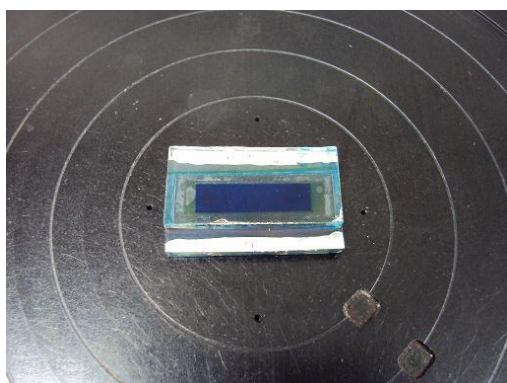

**Device F dyed with SQ1**

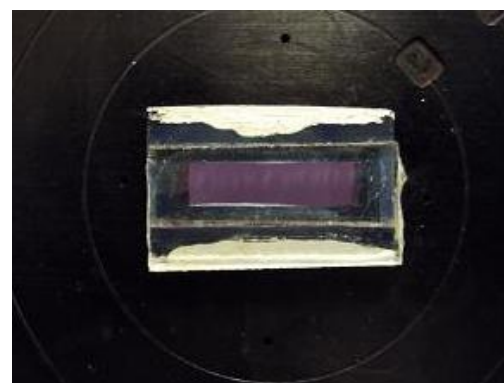

**Device G dyed with N719**

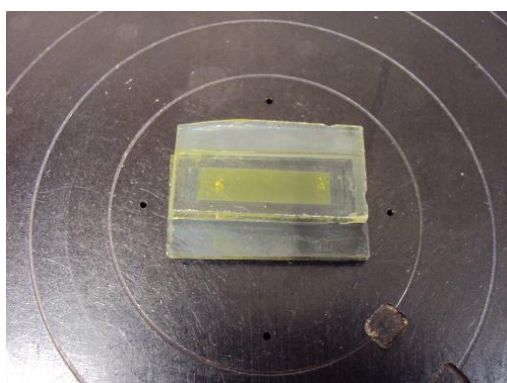

**Device J dyed with (6)**

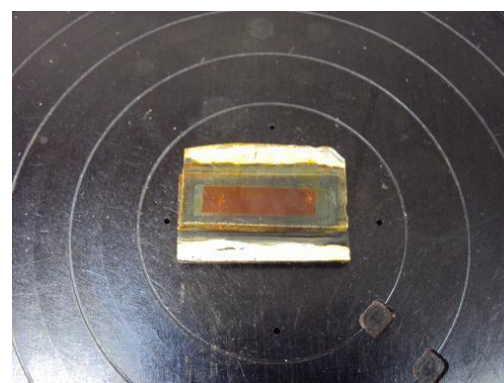

**Device J after adding (5)**

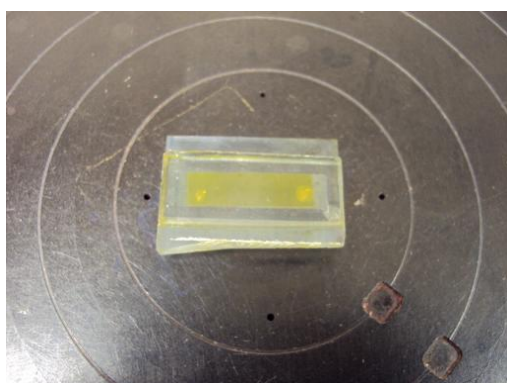

**Device H1 dyed with (6)**

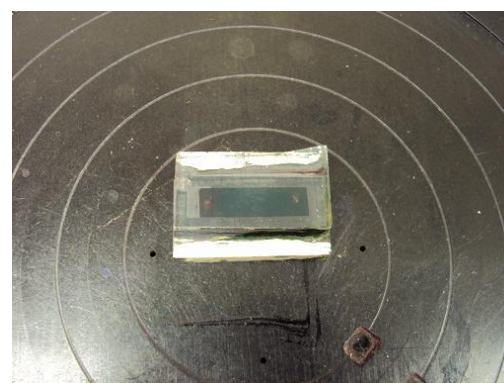

**Device H1 after adding N719**

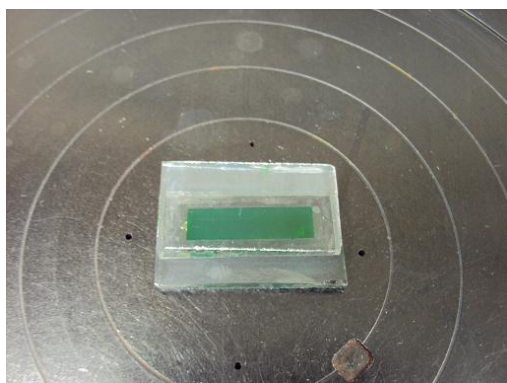

**Device K dyed with mixture of (6) YD and SQ1**

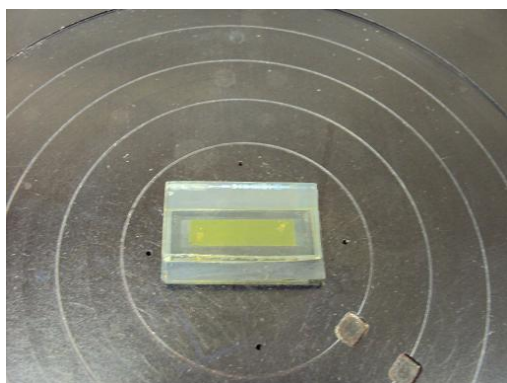

**Device N dyed with (6)**

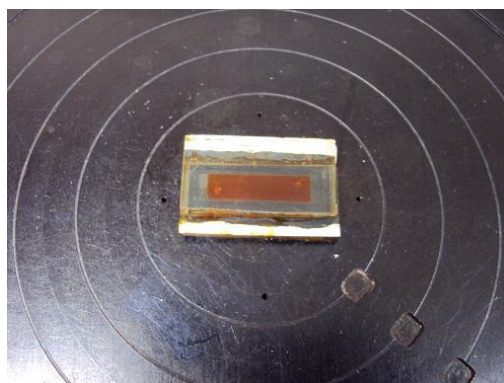

**Device N after adding (5)**

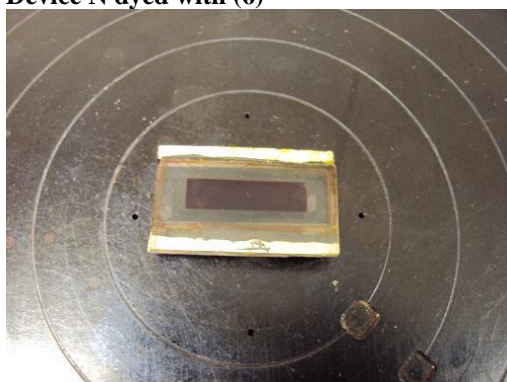

**Device N after adding N719**

**ESI Figure 6.** Photographs of selected devices (2 x 0.5 cm)
